# Supplementary material for: Comorbidities and treatment patterns in early rheumatoid arthritis: a nationwide Swedish study
Source: HighWire-hosted journal article supplement (doi:10.1136/rmdopen-2022-002700), 2022-12-01

**SUPPLEMENTAL MATERIAL****Supplemental table 1.** List of registers used.

| <b>Register</b>                                    | <b>Description</b>                                                                                                                                                                                                                                                             |
|----------------------------------------------------|--------------------------------------------------------------------------------------------------------------------------------------------------------------------------------------------------------------------------------------------------------------------------------|
| <b>Education register (UREG)</b>                   | Founded in 1985 by Statistics Sweden (SCB). Covers highest level of educational attainment for each citizen.                                                                                                                                                                   |
| <b>National Cancer Register</b>                    | Founded in 1958. Covers the whole population. Newly detected cancer (diagnosed at clinical, morphological or other laboratory examinations or autopsies) are compulsory to report.                                                                                             |
| <b>National Patient Register (NPR)</b>             | Founded in the 1960s. Mandatory participation from all counties since 1984. Covers all in-patient care in Sweden since 1987. Since 2001 it also covers out-patient visits from specialized care from both private and public care-givers. Primary health care is not included. |
| <b>National Prescribed Drug Register (PDR)</b>     | Founded in July 2005. Contains all prescribed drugs dispensed at pharmacies.                                                                                                                                                                                                   |
| <b>Swedish Rheumatology Quality Register (SRQ)</b> | Founded in 1995. Covers information on diagnosis/ inclusion date, symptom duration, disease activity and treatment.                                                                                                                                                            |
| <b>Total Population Register (RTB)</b>             | Founded in 1968 by Statistics Sweden (SCB). Covers information on the whole population concerning birth, death, area of residence, immigration, emigration etc.                                                                                                                |

**Supplemental table 2.** Time periods used for comorbidity and antirheumatic drug data in each table and figure.

|                | Comorbidity data                    |                                                     | Anti-rheumatic drug data |                              |                              |
|----------------|-------------------------------------|-----------------------------------------------------|--------------------------|------------------------------|------------------------------|
|                | From 5 years before to RA diagnosis | From 5 years before to 12 months after RA diagnosis | At RA diagnosis          | 12 months after RA diagnosis | 36 months after RA diagnosis |
| Table 1        |                                     |                                                     | X                        |                              |                              |
| Table 2        | X                                   | X                                                   |                          |                              |                              |
| Table 3        |                                     | X                                                   |                          | X                            |                              |
| Figure 2       | X                                   |                                                     | X                        | X                            |                              |
| Figure 3       |                                     | X                                                   |                          | X                            |                              |
| Figure 4       |                                     | X                                                   |                          | X                            |                              |
| Figure 5       | X                                   | X                                                   | X                        | X                            | X                            |
| Suppl table 6  | X                                   | X                                                   |                          |                              |                              |
| Suppl table 7  | X                                   |                                                     | X                        | X                            |                              |
| Suppl table 8  | X                                   |                                                     | X                        | X                            |                              |
| Suppl table 9  |                                     | X                                                   |                          | X                            |                              |
| Suppl table 10 |                                     | X                                                   |                          | X                            |                              |
| Suppl table 11 |                                     | X                                                   |                          | X                            |                              |
| Suppl table 12 |                                     | X                                                   |                          | X                            |                              |
| Suppl table 13 | X                                   | X                                                   | X                        | X                            | X                            |
| Suppl table 14 | X                                   |                                                     | X                        |                              |                              |
| Suppl figure 2 |                                     |                                                     | X                        |                              |                              |

**Supplemental table 3.** ICD-10 and ATC codes used for exclusion of patients<sup>a</sup>.

| <b>Diagnoses</b>             | <b>ICD-10 codes</b>                         |
|------------------------------|---------------------------------------------|
| Rheumatoid arthritis         | M05, M06.0, M06.2-M06.3, M06.8-M06.9, M12.3 |
| Other arthritis              | M13                                         |
| Psoriatic arthritis          | L40.5, M07.0, M07.1, M07.3                  |
| Ankylosing spondylitis       | M45                                         |
| Juvenile arthritis           | M08-M09                                     |
| Inflammatory spondylopathies | M46.0-M46.1, M46.8-M46.9                    |
| SLE                          | M32.0-M32.1, M32.8-M32.9                    |
| PMR                          | M35.3                                       |

  

| <b>Drugs</b>          | <b>ATC codes</b> |
|-----------------------|------------------|
| Abatacept             | L04AA24          |
| Adalimumab            | L04AB04          |
| Anakinra              | L04AC03          |
| Apremilast            | L04AA32          |
| Baricitinib           | L04AA37          |
| Belimumab             | L04AA26          |
| Canakinumab           | L04AC08          |
| Certolizumab pegol    | L04AB05          |
| Etanercept            | L04AB01          |
| Golimumab             | L04AB06          |
| Chloroquine           | P01BA01          |
| Leflunomide           | L04AA13          |
| Methotrexate          | L04AX03          |
| Sodium aurothiomalate | M01CB01          |
| Hydroxychloroquine    | P01BA02          |
| Auranofin             | M01CB03          |
| Secukinumab           | L04AC10          |
| Sulfasalazine         | A07EC01          |
| Tocilizumab           | L04AC07          |
| Tofacitinib           | L04AA29          |
| Ustekinumab           | L04AC05          |

<sup>a</sup>Patients were excluded if they had any of these diagnoses registered >12 months before RA diagnosis or any of these drugs prescribed >1 months before RA diagnosis in SRQ (Swedish Rheumatology Quality register). ICD-10, International Classification of Diseases, 10<sup>th</sup> revision; ATC, Anatomical Therapeutic Chemical Classification.

**Supplemental table 4.** Comorbidity categories and diagnoses with corresponding ICD-10 and/or ATC codes used to capture each comorbidity.

| Comorbidity categories       | Diagnoses                                                   | ICD-10 codes                                                                                                                                   | ATC codes  |
|------------------------------|-------------------------------------------------------------|------------------------------------------------------------------------------------------------------------------------------------------------|------------|
| <b>Cardiovascular</b>        | Ischaemic heart disease                                     | I20-I25                                                                                                                                        |            |
|                              | Acute coronary syndrome                                     | I200, I21-I22                                                                                                                                  |            |
|                              | Heart failure                                               | I50                                                                                                                                            |            |
|                              | Atrial fibrillation                                         | I48                                                                                                                                            |            |
| <b>Non-cardiac vascular</b>  | Peripheral vascular diseases                                | I65-I66, I70-I72, I739, I74                                                                                                                    |            |
|                              | Lipid lowering drugs                                        |                                                                                                                                                | C10        |
|                              | Stroke                                                      | I60-I64                                                                                                                                        |            |
|                              | Transient ischaemic attack                                  | G45                                                                                                                                            |            |
|                              | Thromboembolic venous disease                               | I26, I80-I82                                                                                                                                   |            |
|                              | Hypertension                                                | I10-I15                                                                                                                                        |            |
| <b>Respiratory</b>           | Chronic obstructive pulmonary disease                       | J43-J44                                                                                                                                        |            |
|                              | Chronic interstitial pulmonary disease                      | J84                                                                                                                                            |            |
|                              | Asthma                                                      | J45                                                                                                                                            |            |
| <b>Gastrointestinal</b>      | Inflammatory bowel disease                                  | K50-K51                                                                                                                                        |            |
|                              | Esophageal, gastric and duodenal disease                    | K20-K23, K25-K27, K29                                                                                                                          |            |
|                              | Biliary disease                                             | K80-K81                                                                                                                                        |            |
|                              | Chronic liver disease                                       | K70-K76                                                                                                                                        |            |
| <b>Psychiatric</b>           | Depression                                                  | F32-F33                                                                                                                                        |            |
|                              | Antidepressant drugs                                        |                                                                                                                                                | N06A       |
|                              | Anxiety disorder                                            | F40-F41, F43                                                                                                                                   |            |
|                              | Psychosis                                                   | F20-F29                                                                                                                                        |            |
|                              | Dementia (antidementia drugs)                               | F00-F03, G30-G31                                                                                                                               | N06D       |
| <b>Chronic kidney</b>        | Chronic kidney disease                                      | I12-I13, N03-N05, N07, N18, Q61                                                                                                                |            |
| <b>Infectious</b>            | Hospitalisation due to infectious diseases                  | A00-B99, G00-G02, G042, G05-G07, H66-H67, J00-J22, J32, J340, J36, J838, J390-J391, J85-J86, L00-L08, M00-M01, M462-M465, M86, N10, N300, N390 |            |
| <b>Endocrine</b>             | Type 1 diabetes (insulin) <sup>a</sup>                      | E10                                                                                                                                            | A10A       |
|                              | Type 2 diabetes (glucose-lowering drugs) <sup>b</sup>       | E11                                                                                                                                            | A10B       |
|                              | Thyroid disease (thyroid and antithyroid preparations)      | E038-E039, E050-E053, E055-E059                                                                                                                | H03A, H03B |
| <b>Malignant</b>             | Cancer                                                      | C00-C97, D00-D09                                                                                                                               |            |
| <b>Neurological</b>          | Parkinson's disease                                         | G20                                                                                                                                            |            |
|                              | Multiple sclerosis                                          | G35                                                                                                                                            |            |
|                              | Epilepsy                                                    | G40-G41                                                                                                                                        |            |
|                              | Polyneuropathies and nerve, nerve root and plexus disorders | G50-G59, G60-G65                                                                                                                               |            |
| <b>Fractures<sup>c</sup></b> | Fractures of hip/spine/leg                                  | M485, M489, M800A, M800E-F, M800J-K, M843E-G, S120-S127, S220-S221, S32, T021, T08, S72, S821-                                                 |            |

S824, S827

---

<sup>a</sup>For considered as having type 1 diabetes you had to have the E10 diagnosis, no E11 diagnosis, prescription of insulin and no prescription of glucose-lowering drugs. <sup>b</sup>For considered as having type 2 diabetes you had to have the E11 diagnosis or prescription of glucose-lowering drugs and no E10 diagnosis. <sup>c</sup>Information on fractures was only used for the Rheumatic Disease Comorbidity Index. ICD-10, International Classification of Diseases 10<sup>th</sup> revision; ATC, Anatomical Therapeutic Chemical Classification.

**Supplemental table 5.** Rheumatic Disease Comorbidity Index.

|                           |                                                                                                                                                                                                               |
|---------------------------|---------------------------------------------------------------------------------------------------------------------------------------------------------------------------------------------------------------|
| <b>Comorbidity groups</b> | Lung disease<br>Heart Attack<br>Other Cardiovascular disease<br>Stroke<br>Hypertension<br>Diabetes<br>Fracture (of hip/spine/leg)<br>Depression<br>Cancer<br>Gastrointestinal ulcer<br>Other stomach problems |
| <b>Formula</b>            | 2 x lung disease + [2 x (heart attack, other cardiovascular disease, or stroke), or 1 x hypertension + fracture + depression + diabetes + cancer + (ulcer or stomach problem)]                                |

See methods and reference [20-22].

**Supplemental table 6.** Number of comorbidity categories at baseline and at 12 months after diagnosis.

| <b>Number of comorbidity categories</b> | <b>At diagnosis<br/>n (%)</b> | <b>At 12 months<br/>n (%)</b> |
|-----------------------------------------|-------------------------------|-------------------------------|
| <b>0</b>                                | 6057 (44.9)                   | 5151 (38.5)                   |
| <b>1</b>                                | 3725 (27.6)                   | 3738 (28.0)                   |
| <b>2</b>                                | 2168 (16.1)                   | 2402 (18.0)                   |
| <b>≥3</b>                               | 1555 (11.5)                   | 2082 (15.6)                   |
| <b>Total</b>                            | 13505                         | 13373                         |

**Supplemental table 7.** Number and proportions of patients on the different treatments categories at RA onset and at 12 months, divided in the different comorbidity categories.

| Comorbidity categories             | MTX monotherapy |                |                               | Non-MTX csDMARDs |              |                            | MTX + other csDMARDs |              |                            | b/tsDMARDs   |                |                              | No treatment   |                |                               |
|------------------------------------|-----------------|----------------|-------------------------------|------------------|--------------|----------------------------|----------------------|--------------|----------------------------|--------------|----------------|------------------------------|----------------|----------------|-------------------------------|
|                                    | 0 m             | 12 m           | Δ                             | 0 m              | 12 m         | Δ                          | 0 m                  | 12 m         | Δ                          | 0 m          | 12 m           | Δ                            | 0 m            | 12 m           | Δ                             |
| <b>All patients, n (%)</b>         | 9178<br>(68.0)  | 8282<br>(61.3) | -896<br>(-6.7 <sup>b</sup> )  | 768<br>(5.7)     | 869<br>(6.4) | 101<br>(0.7 <sup>a</sup> ) | 101<br>(0.8)         | 777<br>(5.8) | 676<br>(5.0 <sup>b</sup> ) | 339<br>(2.5) | 1799<br>(13.3) | 1460<br>(10.8 <sup>a</sup> ) | 3119<br>(23.1) | 1778<br>(13.2) | -1341<br>(-9.9)               |
| <b>Cardiovascular, n (%)</b>       | 758<br>(63.4)   | 711<br>(59.5)  | -47<br>(-3.9 <sup>a</sup> )   | 82<br>(6.9)      | 77<br>(6.4)  | -5<br>(-0.5)               | 9<br>(0.8)           | 57<br>(4.8)  | 48<br>(4.0 <sup>b</sup> )  | 20<br>(1.7)  | 96<br>(8.0)    | 76<br>(6.3 <sup>b</sup> )    | 326<br>(27.3)  | 254<br>(21.3)  | -72<br>(-6.0 <sup>b</sup> )   |
| <b>Non-cardiac vascular, n (%)</b> | 2549<br>(69.0)  | 2359<br>(63.8) | -190<br>(-5.2 <sup>b</sup> )  | 189<br>(5.1)     | 217<br>(5.9) | 28<br>(0.8)                | 16<br>(0.4)          | 160<br>(4.3) | 144<br>(3.9 <sup>b</sup> ) | 69<br>(1.9)  | 374<br>(10.1)  | 305<br>(8.2 <sup>b</sup> )   | 872<br>(23.6)  | 585<br>(15.8)  | -287<br>(-7.8 <sup>b</sup> )  |
| <b>Malignant, n (%)</b>            | 359<br>(61.8)   | 368<br>(63.3)  | 9<br>(1.5)                    | 48<br>(8.3)      | 40<br>(6.9)  | -8<br>(-1.4)               | 5<br>(0.9)           | 30<br>(5.2)  | 25<br>(4.3 <sup>b</sup> )  | 3<br>(0.5)   | 46<br>(7.9)    | 43<br>(7.4 <sup>b</sup> )    | 166<br>(28.6)  | 97<br>(16.7)   | -69<br>(-11.9 <sup>b</sup> )  |
| <b>Endocrine, n (%)</b>            | 1820<br>(69.4)  | 1624<br>(61.9) | -196<br>(-7.5 <sup>b</sup> )  | 153<br>(5.8)     | 149<br>(5.7) | -4<br>(-0.1)               | 12<br>(0.5)          | 131<br>(5.0) | 119<br>(4.5 <sup>b</sup> ) | 60<br>(2.3)  | 354<br>(13.5)  | 294<br>(11.2 <sup>b</sup> )  | 579<br>(22.1)  | 365<br>(13.9)  | -214<br>(-8.2 <sup>b</sup> )  |
| <b>Gastrointestinal, n (%)</b>     | 558<br>(63.5)   | 508<br>(57.8)  | -50<br>(-5.7 <sup>a</sup> )   | 46<br>(5.2)      | 50<br>(5.7)  | 4<br>(0.5)                 | 5<br>(0.6)           | 49<br>(5.6)  | 44<br>(5.0 <sup>b</sup> )  | 20<br>(2.3)  | 122<br>(13.9)  | 102<br>(11.6 <sup>b</sup> )  | 250<br>(28.4)  | 150<br>(17.1)  | -100<br>(-11.3 <sup>b</sup> ) |
| <b>Infectious, n (%)</b>           | 513<br>(61.7)   | 474<br>(57.0)  | -39<br>(-4.7)                 | 62<br>(7.5)      | 65<br>(7.8)  | 3<br>(0.3)                 | 4<br>(0.5)           | 38<br>(4.6)  | 34<br>(4.1 <sup>b</sup> )  | 16<br>(1.9)  | 91<br>(10.9)   | 75<br>(9.0 <sup>b</sup> )    | 237<br>(28.5)  | 164<br>(19.7)  | -73<br>(-8.8 <sup>b</sup> )   |
| <b>Chronic kidney, n (%)</b>       | 50<br>(47.6)    | 41<br>(39.1)   | -9<br>(-8.5)                  | 12<br>(11.4)     | 10<br>(9.5)  | -2<br>(-1.9)               | 0<br>(3.8)           | 4<br>(3.8)   | 4<br>(3.8 <sup>a</sup> )   | 4<br>(3.8)   | 15<br>(14.3)   | 11<br>(10.5 <sup>b</sup> )   | 39<br>(37.1)   | 35<br>(33.3)   | -4<br>(-3.8)                  |
| <b>Neurological, n (%)</b>         | 656<br>(70.6)   | 556<br>(59.9)  | -100<br>(-10.7 <sup>b</sup> ) | 31<br>(3.3)      | 51<br>(5.5)  | 20<br>(2.2 <sup>a</sup> )  | 3<br>(0.3)           | 52<br>(5.6)  | 49<br>(5.3 <sup>b</sup> )  | 19<br>(2.1)  | 135<br>(14.5)  | 116<br>(12.4 <sup>b</sup> )  | 220<br>(23.7)  | 135<br>(14.5)  | -85<br>(-9.2 <sup>b</sup> )   |
| <b>Psychiatric, n (%)</b>          | 1310<br>(66.7)  | 1143<br>(58.2) | -167<br>(-8.5 <sup>b</sup> )  | 108<br>(5.5)     | 135<br>(6.9) | 27<br>(1.4)                | 5<br>(0.3)           | 107<br>(5.5) | 102<br>(5.2 <sup>b</sup> ) | 42<br>(2.1)  | 286<br>(14.6)  | 244<br>(12.5 <sup>b</sup> )  | 498<br>(25.4)  | 292<br>(14.9)  | -206<br>(-10.5 <sup>b</sup> ) |
| <b>Respiratory, n (%)</b>          | 413<br>(56.8)   | 341<br>(46.9)  | -72<br>(-9.9 <sup>b</sup> )   | 84<br>(11.6)     | 93<br>(12.8) | 9<br>(1.2)                 | 3<br>(0.4)           | 39<br>(5.4)  | 36<br>(5.0 <sup>b</sup> )  | 18<br>(2.5)  | 110<br>(15.1)  | 92<br>(12.6 <sup>b</sup> )   | 209<br>(28.8)  | 144<br>(19.8)  | -65<br>(-9.0 <sup>b</sup> )   |
| <b>No comorbidity, n (%)</b>       | 4133<br>(68.3)  | 3711<br>(61.3) | -422<br>(-7.0 <sup>b</sup> )  | 340<br>(5.6)     | 395<br>(6.5) | 55<br>(0.9 <sup>a</sup> )  | 63<br>(1.0)          | 391<br>(6.5) | 328<br>(5.5 <sup>b</sup> ) | 189<br>(3.1) | 887<br>(14.6)  | 698<br>(11.5 <sup>b</sup> )  | 1332<br>(22.0) | 673<br>(11.1)  | -659<br>(-10.9 <sup>b</sup> ) |

Δ = change in drug use in number and percentage. Comorbidity data from RA diagnosis is used for both drug data at 0 and 12 months. The results were calculated on 13 505 patients both at 0 and 12 months. <sup>a</sup>P value <0.05, <sup>b</sup>P value <0.01 (0.05/5 treatment groups, corrected for multiple testing), otherwise non-significant results, calculated by X<sup>2</sup> test.



**Supplemental table 8.** Methotrexate monotherapy and total methotrexate use at RA diagnosis and at 12 months, divided by comorbidity categories.

| Comorbidity categories         | MTX                | MTX          | MTX                 | MTX           |
|--------------------------------|--------------------|--------------|---------------------|---------------|
|                                | monotherapy<br>0 m | total<br>0 m | monotherapy<br>12 m | total<br>12 m |
| <b>All patients, n</b>         | 9178               | 9548         | 8282                | 10382         |
| <b>(%)</b>                     | (68.0)             | (70.7)       | (61.3)              | (76.9)        |
| <b>Cardiovascular, n</b>       | 758                | 781          | 711                 | 834           |
| <b>(%)</b>                     | (63.4)             | (65.4)       | (59.5)              | (69.8)        |
| <b>Non-cardiac vascular, n</b> | 2549               | 2617         | 2359                | 2772          |
| <b>(%)</b>                     | (69.0)             | (70.8)       | (63.8)              | (75.0)        |
| <b>Malignant, n</b>            | 359                | 365          | 368                 | 426           |
| <b>(%)</b>                     | (61.8)             | (62.8)       | (63.3)              | (73.3)        |
| <b>Endocrine, n</b>            | 1820               | 1871         | 1624                | 1998          |
| <b>(%)</b>                     | (69.4)             | (71.3)       | (61.9)              | (76.2)        |
| <b>Gastrointestinal, n</b>     | 558                | 574          | 508                 | 634           |
| <b>(%)</b>                     | (63.5)             | (65.3)       | (57.8)              | (72.1)        |
| <b>Infectious, n</b>           | 513                | 527          | 474                 | 565           |
| <b>(%)</b>                     | (61.7)             | (63.3)       | (57.0)              | (67.9)        |
| <b>Chronic kidney, n</b>       | 50                 | 52           | 41                  | 50            |
| <b>(%)</b>                     | (47.6)             | (49.5)       | (39.1)              | (47.6)        |
| <b>Neurological, n</b>         | 656                | 674          | 556                 | 700           |
| <b>(%)</b>                     | (70.6)             | (72.6)       | (59.9)              | (75.3)        |
| <b>Psychiatric, n</b>          | 1310               | 1342         | 1143                | 1446          |
| <b>(%)</b>                     | (66.7)             | (68.4)       | (58.2)              | (73.7)        |
| <b>Respiratory, n</b>          | 413                | 427          | 341                 | 445           |
| <b>(%)</b>                     | (56.8)             | (58.7)       | (46.9)              | (61.2)        |
| <b>No comorbidity, n</b>       | 4133               | 4359         | 3711                | 4783          |
| <b>(%)</b>                     | (68.3)             | (72.0)       | (61.3)              | (79.0)        |

Comorbidity data from RA diagnosis is used for both drug data at 0 and 12 months. The results were calculated on 13 505 patients both at 0 and 12 months. MTX, methotrexate. MTX total, methotrexate +/- combination with cs/b/tsDMARDs.

**Supplemental table 9.** Association of comorbidity categories and antirheumatic treatment categories, in relation to methotrexate, at 12 months after RA diagnosis.

| COMORBIDITY CATEGORIES      | RA TREATMENT         |             | CRUDE               | ADJUSTED FOR SEX AND AGE | FULL MODEL*         |
|-----------------------------|----------------------|-------------|---------------------|--------------------------|---------------------|
| Number of observations      |                      |             | 13 373              | 13 373                   | 13 373              |
|                             |                      | n (%)       | OR (95% CI)         | OR (95% CI)              | OR (95% CI)         |
| <b>Cardiovascular</b>       | MTX monotherapy      | 858 (62.1)  | Reference           | Reference                | Reference           |
|                             | Non-MTX csDMARDs     | 89 (6.4)    | 0.98 (0.76 to 1.27) | 1.18 (0.91 to 1.53)      | 1.19 (0.76 to 1.88) |
|                             | MTX + other csDMARDs | 66 (4.8)    | 1.02 (0.76 to 1.36) | 1.17 (0.88 to 1.57)      | 1.17 (0.71 to 1.94) |
|                             | b/tsDMARD            | 125 (9.0)   | 0.73 (0.59 to 0.90) | 0.93 (0.75 to 1.15)      | 0.92 (0.65 to 1.31) |
|                             | No treatment         | 244 (17.7)  | 1.23 (1.04 to 1.46) | 1.29 (1.08 to 1.54)      | 1.30 (0.95 to 1.78) |
| <b>Non-cardiac vascular</b> | MTX monotherapy      | 2802(64.6)  | Reference           | Reference                | Reference           |
|                             | Non-MTX csDMARDs     | 251 (5.8)   | 0.70 (0.58 to 0.85) | 0.88 (0.72 to 1.07)      | 0.88 (0.69 to 1.13) |
|                             | MTX + other csDMARDs | 198 (4.6)   | 0.69 (0.56 to 0.85) | 0.85 (0.68 to 1.05)      | 0.84 (0.65 to 1.10) |
|                             | b/tsDMARD            | 465 (10.7)  | 0.72 (0.62 to 0.83) | 1.04 (0.89 to 1.21)      | 1.05 (0.88 to 1.26) |
|                             | No treatment         | 619 (14.3)  | 0.91 (0.79 to 1.05) | 0.96 (0.83 to 1.11)      | 0.98 (0.82 to 1.16) |
| <b>Malignant</b>            | MTX monotherapy      | 509 (65.3)  | Reference           | Reference                | Reference           |
|                             | Non-MTX csDMARDs     | 48 (6.2)    | 0.86 (0.63 to 1.18) | 0.96 (0.70 to 1.31)      | 0.96 (0.66 to 1.39) |
|                             | MTX + other csDMARDs | 36 (4.6)    | 0.81 (0.56 to 1.15) | 0.89 (0.62 to 1.27)      | 0.88 (0.58 to 1.33) |
|                             | b/tsDMARD            | 61 (7.8)    | 0.59 (0.45 to 0.77) | 0.69 (0.52 to 0.91)      | 0.69 (0.51 to 0.95) |
|                             | No treatment         | 126 (16.2)  | 1.10 (0.89 to 1.36) | 1.13 (0.92 to 1.40)      | 1.10 (0.85 to 1.41) |
| <b>Endocrine</b>            | MTX monotherapy      | 1717 (62.1) | Reference           | Reference                | Reference           |
|                             | Non-MTX csDMARDs     | 161 (5.8)   | 0.90 (0.74 to 1.10) | 0.89 (0.73 to 1.09)      | 0.90 (0.72 to 1.11) |
|                             | MTX + other csDMARDs | 142 (5.1)   | 0.97 (0.78 to 1.20) | 0.98 (0.79 to 1.21)      | 0.97 (0.77 to 1.23) |
|                             | b/tsDMARD            | 382 (13.8)  | 1.22 (1.06 to 1.41) | 1.24 (1.07 to 1.43)      | 1.23 (1.05 to 1.45) |
|                             | No treatment         | 365 (13.2)  | 0.98 (0.85 to 1.13) | 0.98 (0.85 to 1.12)      | 0.98 (0.84 to 1.14) |
| <b>Gastrointestinal</b>     | MTX monotherapy      | 632 (58.5)  | Reference           | Reference                | Reference           |
|                             | Non-MTX csDMARDs     | 69 (6.4)    | 1.01 (0.77 to 1.32) | 1.02 (0.78 to 1.34)      | 1.04 (0.75 to 1.45) |
|                             | MTX + other csDMARDs | 55 (5.1)    | 1.01 (0.75 to 1.36) | 1.03 (0.77 to 1.39)      | 1.02 (0.71 to 1.46) |

|                       |                      |             |                     |                     |                     |
|-----------------------|----------------------|-------------|---------------------|---------------------|---------------------|
|                       | b/tsDMARD            | 153 (14.2)  | 1.25 (1.03 to 1.52) | 1.29 (1.06 to 1.57) | 1.28 (1.01 to 1.63) |
|                       | No treatment         | 172 (15.9)  | 1.20 (0.99 to 1.44) | 1.20 (1.00 to 1.44) | 1.21 (0.96 to 1.52) |
| <b>Infectious</b>     | MTX monotherapy      | 631 (56.5)  | Reference           | Reference           | Reference           |
|                       | Non-MTX csDMARDs     | 85 (7.6)    | 1.17 (0.91 to 1.51) | 1.22 (0.95 to 1.58) | 1.22 (0.94 to 1.58) |
|                       | MTX + other csDMARDs | 47 (4.2)    | 0.86 (0.63 to 1.18) | 0.90 (0.65 to 1.23) | 0.90 (0.65 to 1.24) |
|                       | b/tsDMARD            | 136 (12.2)  | 1.09 (0.89 to 1.34) | 1.16 (0.95 to 1.43) | 1.19 (0.97 to 1.46) |
|                       | No treatment         | 217 (19.4)  | 1.48 (1.24 to 1.76) | 1.49 (1.25 to 1.78) | 1.47 (1.23 to 1.75) |
| <b>Chronic kidney</b> | MTX monotherapy      | 65 (42.2)   | Reference           | Reference           | Reference           |
|                       | Non-MTX csDMARDs     | 13 (8.4)    | 2.17 (1.18 to 4.01) | 2.32 (1.26 to 4.30) | 2.34 (1.26 to 4.34) |
|                       | MTX + other csDMARDs | 7 (4.6)     | 1.48 (0.67 to 3.28) | 1.56 (0.70 to 3.44) | 1.57 (0.71 to 3.48) |
|                       | b/tsDMARD            | 21 (13.6)   | 1.95 (1.18 to 3.24) | 2.11 (1.27 to 3.51) | 2.09 (1.25 to 3.48) |
|                       | No treatment         | 48 (31.2)   | 3.12 (2.12 to 4.60) | 3.17 (2.15 to 4.67) | 3.25 (2.20 to 4.81) |
| <b>Neurological</b>   | MTX monotherapy      | 686 (60.5)  | Reference           | Reference           | Reference           |
|                       | Non-MTX csDMARDs     | 66 (5.8)    | 0.91 (0.69 to 1.20) | 0.90 (0.68 to 1.19) | 0.90 (0.69 to 1.19) |
|                       | MTX + other csDMARDs | 62 (5.5)    | 1.01 (0.76 to 1.34) | 1.00 (0.75 to 1.34) | 0.99 (0.74 to 1.32) |
|                       | b/tsDMARD            | 159 (14.0)  | 1.16 (0.96 to 1.41) | 1.17 (0.96 to 1.42) | 1.19 (0.98 to 1.44) |
|                       | No treatment         | 161 (14.2)  | 1.12 (0.93 to 1.35) | 1.11 (0.92 to 1.34) | 1.10 (0.91 to 1.34) |
| <b>Psychiatric</b>    | MTX monotherapy      | 1356 (58.6) | Reference           | Reference           | Reference           |
|                       | Non-MTX csDMARDs     | 165 (7.1)   | 1.18 (0.97 to 1.45) | 1.06 (0.86 to 1.30) | 1.08 (0.82 to 1.41) |
|                       | MTX + other csDMARDs | 131 (5.7)   | 1.09 (0.87 to 1.36) | 1.00 (0.80 to 1.30) | 0.98 (0.73 to 1.33) |
|                       | b/tsDMARD            | 340 (14.7)  | 1.29 (1.11 to 1.50) | 1.13 (0.97 to 1.32) | 1.12 (0.91 to 1.37) |
|                       | No treatment         | 321 (13.9)  | 1.14 (0.98 to 1.32) | 1.10 (0.95 to 1.28) | 1.12 (0.92 to 1.35) |
| <b>Respiratory</b>    | MTX monotherapy      | 450 (48.1)  | Reference           | Reference           | Reference           |
|                       | Non-MTX csDMARDs     | 122 (13.1)  | 3.05 (2.44 to 3.82) | 3.18 (2.53 to 4.01) | 3.29 (2.12 to 5.11) |
|                       | MTX + other csDMARDs | 46 (4.9)    | 1.27 (0.92 to 1.76) | 1.33 (0.96 to 1.84) | 1.30 (0.77 to 2.19) |
|                       | b/tsDMARD            | 147 (15.7)  | 1.85 (1.51 to 2.26) | 1.99 (1.62 to 2.45) | 1.89 (1.34 to 2.67) |
|                       | No treatment         | 170 (18.2)  | 1.70 (1.40 to 2.06) | 1.71 (1.41 to 2.08) | 1.83 (1.32 to 2.53) |
| <b>No comorbidity</b> | MTX monotherapy      | 3177 (61.7) | Reference           | Reference           | Reference           |
|                       | Non-MTX csDMARDs     | 334 (6.5)   | 1.01 (0.81 to 1.26) | 0.93 (0.75 to 1.16) | 0.93 (0.74 to 1.16) |
|                       | MTX + other csDMARDs | 46 (4.9)    | 1.06 (0.84 to 1.34) | 0.98 (0.77 to 1.24) | 0.98 (0.77 to 1.25) |

|              |            |                            |                     |                     |
|--------------|------------|----------------------------|---------------------|---------------------|
| b/tsDMARD    | 147 (15.7) | <i>1.23 (1.05 to 1.45)</i> | 1.08 (0.92 to 1.28) | 1.08 (0.91 to 1.28) |
| No treatment | 531 (10.3) | 0.94 (0.79 to 1.10)        | 0.92 (0.78 to 1.09) | 0.92 (0.78 to 1.09) |

\*Adjusted for sex, age, smoking, educational level, serological status, Rheumatic Disease Comorbidity Index. Results calculated by multinomial logistic regression. We included patients where there was missing data on smoking: 1938 patients (14.5%), educational level: 88 patients (0.7%) and serological status: 374 patients (2.8%), in the full model. Significant results in italic. Reference, methotrexate was used as the reference drug.

**Supplemental table 10.** Comparison of logarithmic binomial regression and multinomial logistic regression for results with odds ratios above 3 in supplemental table 9

| <b>Chronic kidney disease:<br/>MTX vs No treatment</b>     | <b>Results</b>   |
|------------------------------------------------------------|------------------|
| <b>Odds ratios (using multinomial logistic regression)</b> | 3.25 (2.20-4.81) |
| <b>Relative risk (using log binomial regression)</b>       | 3.16 (2.14-4.67) |

  

| <b>Respiratory diseases:<br/>MTX vs Non-MTX csDMARDs</b>  |                  |
|-----------------------------------------------------------|------------------|
| <b>Odds ratio (using multinomial logistic regression)</b> | 3.29 (2.12-5.11) |
| <b>Relative risk (using log binomial regression)</b>      | 3.22 (2.41-4.29) |

All results showing full model, i.e. adjusted for sex, age, smoking, educational level, serological status, Rheumatic Disease Comorbidity Index.

**Supplemental table 11.** Association of comorbidity categories and antirheumatic treatment categories, in relation to methotrexate, at 12 months after RA diagnosis, stratified by age.

| Comorbidity categories      | RA treatment         | Full model* <65 years (n: 7815) |                     | Full model* ≥65 years (n:5558) |                     |
|-----------------------------|----------------------|---------------------------------|---------------------|--------------------------------|---------------------|
|                             |                      | n (%)                           | OR (95%)            | n (%)                          | OR (95%)            |
| <b>Cardiovascular</b>       | MTX monotherapy      | 150 (54.4)                      | Reference           | 708 (66.5)                     | Reference           |
|                             | Non-MTX csDMARDs     | 19 (6.9)                        | 1.92 (0.87 to 4.23) | 70 (6.3)                       | 0.84 (0.48 to 1.49) |
|                             | MTX + other csDMARDs | 25 (9.1)                        | 2.40 (1.13 to 5.09) | 41 (3.7)                       | 0.78 (0.39 to 1.55) |
|                             | b/tsDMARDs           | 57 (20.7)                       | 1.66 (0.99 to 2.76) | 68 (6.2)                       | 0.64 (0.39 to 1.06) |
|                             | No treatment         | 25 (9.1)                        | 1.17 (0.61 to 2.25) | 219 (19.8)                     | 1.15 (0.79 to 1.67) |
| <b>Non-cardiac vascular</b> | MTX monotherapy      | 867 (60.8)                      | Reference           | 1935 (66.5)                    | Reference           |
|                             | Non-MTX csDMARDs     | 87 (6.1)                        | 1.07 (0.75 to 1.52) | 164 (5.6)                      | 0.72 (0.52 to 1.01) |
|                             | MTX + other csDMARDs | 97 (6.8)                        | 1.05 (0.74 to 1.48) | 101 (3.5)                      | 0.62 (0.41 to 0.94) |
|                             | b/tsDMARDs           | 229 (16.1)                      | 0.96 (0.75 to 1.22) | 236 (8.1)                      | 1.27 (0.93 to 1.73) |
|                             | No treatment         | 147 (10.3)                      | 0.90 (0.68 to 1.19) | 472 (16.2)                     | 1.07 (0.85 to 1.35) |
| <b>Malignant</b>            | MTX monotherapy      | 143 (57.2)                      | Reference           | 366 (69.1)                     | Reference           |
|                             | Non-MTX csDMARDs     | 17 (6.8)                        | 1.28 (0.70 to 2.35) | 31 (9.7)                       | 0.78 (0.49 to 1.24) |
|                             | MTX + other csDMARDs | 16 (6.4)                        | 1.17 (0.63 to 2.18) | 20 (3.8)                       | 0.72 (0.41 to 1.26) |
|                             | b/tsDMARDs           | 34 (13.6)                       | 0.89 (0.58 to 1.38) | 27 (5.1)                       | 0.59 (0.37 to 0.94) |
|                             | No treatment         | 40 (16.0)                       | 1.55 (0.99 to 2.42) | 86 (16.2)                      | 0.95 (0.70 to 1.29) |
| <b>Endocrine</b>            | MTX monotherapy      | 708 (55.6)                      | Reference           | 1009 (67.6)                    | Reference           |
|                             | Non-MTX csDMARDs     | 80 (6.3)                        | 1.03 (0.76 to 1.41) | 81 (5.4)                       | 0.80 (0.59 to 1.09) |
|                             | MTX + other csDMARDs | 80 (6.3)                        | 1.02 (0.74 to 1.39) | 62 (4.2)                       | 0.95 (0.66 to 1.38) |
|                             | b/tsDMARDs           | 260 (20.4)                      | 1.36 (1.11 to 1.66) | 122 (8.2)                      | 1.08 (0.83 to 1.42) |
|                             | No treatment         | 146 (11.5)                      | 1.13 (0.88 to 1.44) | 219 (14.7)                     | 0.88 (0.72 to 1.08) |
| <b>Gastrointestinal</b>     | MTX monotherapy      | 269 (54.0)                      | Reference           | 363 (62.3)                     | Reference           |
|                             | Non-MTX csDMARDs     | 40 (8.0)                        | 1.62 (1.01 to 2.61) | 29 (5.0)                       | 0.71 (0.44 to 1.14) |
|                             | MTX + other csDMARDs | 28 (5.6)                        | 1.06 (0.64 to 1.77) | 27 (4.6)                       | 1.01 (0.60 to 1.70) |
|                             | b/tsDMARDs           | 99 (19.9)                       | 1.34 (0.98 to 1.85) | 54 (9.3)                       | 1.22 (0.83 to 1.79) |
|                             | No treatment         | 62 (12.5)                       | 1.33 (0.90 to 1.96) | 110 (18.9)                     | 1.17 (0.87 to 1.56) |
| <b>Infectious</b>           | MTX monotherapy      | 207 (52.0)                      | Reference           | 424 (59.1)                     | Reference           |
|                             | Non-MTX csDMARDs     | 33 (8.3)                        | 1.25 (0.83 to 1.87) | 52 (7.2)                       | 1.15 (0.82 to 1.61) |
|                             | MTX + other csDMARDs | 19 (4.8)                        | 0.71 (0.43 to 1.16) | 28 (3.9)                       | 1.21 (0.79 to 1.87) |
|                             | b/tsDMARDs           | 75 (18.8)                       | 1.13 (0.85 to 1.51) | 61 (8.5)                       | 1.29 (0.94 to 1.76) |
|                             | No treatment         | 64 (16.1)                       | 1.49 (1.09 to 2.03) | 153 (21.3)                     | 1.34 (1.07 to 1.68) |
| <b>Chronic kidney</b>       | MTX monotherapy      | 15 (42.9)                       | Reference           | 50 (42.0)                      | Reference           |
|                             | Non-MTX csDMARDs     | 5 (14.3)                        | 3.63 (1.28 to 10.3) | 8 (6.7)                        | 1.83 (0.84 to 3.96) |
|                             | MTX + other csDMARDs | 3 (8.6)                         | 1.87 (0.53 to 6.60) | 4 (3.4)                        | 1.46 (0.51 to 4.15) |
|                             | b/tsDMARDs           | 5 (14.3)                        | 1.19 (0.43 to 3.33) | 16 (13.5)                      | 2.83 (1.55 to 5.17) |
|                             | No treatment         | 7 (20.0)                        | 2.53 (1.00 to 6.41) | 41 (34.5)                      | 3.04 (1.96 to 4.72) |
| <b>Neurological</b>         | MTX monotherapy      | 382 (58.7)                      | Reference           | 304 (62.9)                     | Reference           |
|                             | Non-MTX csDMARDs     | 41 (6.3)                        | 0.97 (0.68 to 1.39) | 25 (5.2)                       | 0.90 (0.58 to 1.38) |
|                             | MTX + other csDMARDs | 41 (6.3)                        | 0.88 (0.61 to 1.27) | 21 (4.4)                       | 1.17 (0.72 to 1.89) |
|                             | b/tsDMARDs           | 108 (16.6)                      | 1.01 (0.79 to 1.29) | 51 (10.6)                      | 1.62 (1.16 to 2.25) |
|                             | No treatment         | 79 (12.1)                       | 1.04 (0.79 to 1.37) | 82 (17.0)                      | 1.23 (0.94 to 1.61) |
| <b>Psychiatric</b>          | MTX monotherapy      | 791 (54.1)                      | Reference           | 565 (66.5)                     | Reference           |
|                             | Non-MTX csDMARDs     | 113 (7.7)                       | 1.47 (1.00 to 2.17) | 52 (6.1)                       | 0.86 (0.58 to 1.28) |
|                             | MTX + other csDMARDs | 103 (7.0)                       | 1.30 (0.88 to 1.93) | 28 (3.3)                       | 0.62 (0.37 to 1.03) |
|                             | b/tsDMARDs           | 276 (18.9)                      | 1.22 (0.94 to 1.58) | 64 (7.5)                       | 0.88 (0.62 to 1.25) |

|                       |                      |             |                            |            |                            |
|-----------------------|----------------------|-------------|----------------------------|------------|----------------------------|
|                       | No treatment         | 180 (12.3)  | 1.29 (0.95 to 1.76)        | 141 (16.6) | 1.01 (0.78 to 1.30)        |
| <b>Respiratory</b>    | MTX monotherapy      | 152 (42.0)  | Reference                  | 298 (52.0) | Reference                  |
|                       | Non-MTX csDMARDs     | 47 (13.0)   | <i>4.59 (2.28 to 9.24)</i> | 75 (13.1)  | <i>2.70 (1.53 to 4.76)</i> |
|                       | MTX + other csDMARDs | 26 (7.2)    | <i>2.31 (1.11 to 4.83)</i> | 20 (3.5)   | <i>0.73 (0.34 to 1.54)</i> |
|                       | b/tsDMARDs           | 83 (22.9)   | <i>2.14 (1.32 to 3.47)</i> | 64 (11.2)  | <i>1.74 (1.05 to 2.89)</i> |
|                       | No treatment         | 54 (14.9)   | <i>2.67 (1.49 to 4.78)</i> | 116 (20.2) | <i>1.56 (1.05 to 2.32)</i> |
| <b>No comorbidity</b> | MTX monotherapy      | 2233 (58.0) | Reference                  | 944 (72.7) | Reference                  |
|                       | Non-MTX csDMARDs     | 273 (7.1)   | 1.16 (0.86 to 1.57)        | 61 (4.7)   | 0.69 (0.47 to 1.01)        |
|                       | MTX + other csDMARDs | 281 (7.3)   | 1.04 (0.76 to 1.41)        | 62 (4.8)   | 0.88 (0.57 to 1.36)        |
|                       | b/tsDMARDs           | 670 (17.4)  | 1.08 (0.88 to 1.33)        | 96 (7.4)   | 1.16 (0.82 to 1.65)        |
|                       | No treatment         | 395 (10.3)  | 0.90 (0.70 to 1.14)        | 136 (10.5) | 0.93 (0.71 to 1.23)        |

\*The full model was adjusted for sex, age, smoking, educational level, serological status, Rheumatic Disease Comorbidity Index. Results calculated by multinomial logistic regression. We included patients where there was missing data on smoking, educational level and serological status in this model. Significant results in italic. Reference, methotrexate (MTX) was used as the reference drug.

**Supplemental table 12.** Number and proportions of patients on the different treatments categories for each comorbidity category, at one year after RA-diagnosis, divided by seropositivity.

| Comorbidity categories             | MTX monotherapy |                |         | Non-MTX csDMARDs |              |         | MTX + other csDMARDs |              |         | b/tsDMARDs     |               |         | No treatment   |               |         |
|------------------------------------|-----------------|----------------|---------|------------------|--------------|---------|----------------------|--------------|---------|----------------|---------------|---------|----------------|---------------|---------|
|                                    | Sero-pos        | Sero-neg       | p-value | Sero-pos         | Sero-neg     | p-value | Sero-pos             | Sero-neg     | p-value | Sero-pos       | Sero-neg      | p-value | Sero-pos       | Sero-neg      | p-value |
| <b>All patients, n (%)</b>         | 5656<br>(61.1)  | 2399<br>(62.1) | 0.31    | 532<br>(5.8)     | 217<br>(5.6) | 0.23    | 613<br>(6.6)         | 234<br>(6.1) | 0.76    | 1369<br>(14.8) | 392<br>(10.1) | <0.0001 | 1085<br>(11.7) | 624<br>(16.1) | <0.0001 |
| <b>Cardiovascular, n (%)</b>       | 526<br>(58.3)   | 308<br>(61.5)  | 0.24    | 62<br>(6.9)      | 25<br>(5.0)  | 0.16    | 42<br>(4.7)          | 22<br>(4.4)  | 0.82    | 98<br>(10.9)   | 25<br>(5.0)   | 0.0002  | 175<br>(19.4)  | 121<br>(24.2) | 0.036   |
| <b>Non-cardiac vascular, n (%)</b> | 1780<br>(62.8)  | 949<br>(64.4)  | 0.32    | 159<br>(5.6)     | 85<br>(5.8)  | 0.84    | 129<br>(4.6)         | 63<br>(4.3)  | 0.67    | 349<br>(12.3)  | 111<br>(7.5)  | <0.0001 | 416<br>(14.7)  | 266<br>(18.1) | 0.004   |
| <b>Malignant, n (%)</b>            | 313<br>(62.7)   | 181<br>(63.3)  | 0.88    | 27<br>(5.4)      | 19<br>(6.6)  | 0.48    | 21<br>(4.2)          | 13<br>(4.6)  | 0.82    | 48<br>(9.6)    | 12<br>(4.2)   | 0.0059  | 90<br>(18.0)   | 61<br>(21.3)  | 0.26    |
| <b>Endocrine, n (%)</b>            | 1145<br>(61.0)  | 522<br>(61.9)  | 0.65    | 111<br>(5.9)     | 47<br>(5.6)  | 0.73    | 96<br>(5.1)          | 42<br>(5.0)  | 0.88    | 288<br>(15.3)  | 85<br>(10.1)  | 0.0002  | 237<br>(12.6)  | 147<br>(17.4) | 0.0009  |
| <b>Gastrointestinal, n (%)</b>     | 431<br>(58.2)   | 184<br>(53.3)  | 0.13    | 45<br>(6.1)      | 21<br>(6.1)  | 0.99    | 36<br>(4.9)          | 19<br>(5.5)  | 0.65    | 109<br>(14.7)  | 42<br>(12.2)  | 0.26    | 120<br>(16.2)  | 79<br>(22.9)  | 0.008   |
| <b>Infectious, n (%)</b>           | 431<br>(54.7)   | 188<br>(53.6)  | 0.72    | 60<br>(7.6)      | 24<br>(6.8)  | 0.64    | 35<br>(4.4)          | 12<br>(3.4)  | 0.42    | 101<br>(12.8)  | 34<br>(9.7)   | 0.13    | 161<br>(20.4)  | 93<br>(26.5)  | 0.023   |
| <b>Chronic kidney, n (%)</b>       | 45<br>(42.9)    | 21<br>(37.5)   | 0.51    | 10<br>(9.5)      | 2<br>(3.6)   | 0.17    | 6<br>(5.7)           | 1<br>(1.8)   | 0.24    | 16<br>(15.2)   | 4<br>(7.1)    | 0.14    | 28<br>(26.7)   | 28<br>(50.0)  | 0.003   |
| <b>Neurological, n (%)</b>         | 434<br>(59.9)   | 237<br>(60.8)  | 0.77    | 50<br>(6.9)      | 16<br>(4.1)  | 0.059   | 43<br>(5.9)          | 19<br>(4.9)  | 0.46    | 107<br>(14.8)  | 45<br>(11.5)  | 0.14    | 91<br>(12.6)   | 73<br>(18.7)  | 0.0056  |
| <b>Psychiatric, n (%)</b>          | 912<br>(57.3)   | 409<br>(60.1)  | 0.21    | 122<br>(7.7)     | 38<br>(5.6)  | 0.076   | 91<br>(5.7)          | 36<br>(5.3)  | 0.69    | 256<br>(16.1)  | 76<br>(11.2)  | 0.0024  | 212<br>(13.3)  | 122<br>(17.9) | 0.0045  |
| <b>Respiratory, n (%)</b>          | 322<br>(45.4)   | 120<br>(50.6)  | 0.16    | 98<br>(13.8)     | 22<br>(9.3)  | 0.069   | 35<br>(4.9)          | 10<br>(4.2)  | 0.65    | 115<br>(16.2)  | 28<br>(11.8)  | 0.10    | 139<br>(19.6)  | 57<br>(24.1)  | 0.14    |
| <b>No comorbidity, n (%)</b>       | 2293<br>(61.6)  | 811<br>(62.2)  | 0.69    | 247<br>(6.6)     | 79<br>(6.1)  | 0.47    | 233<br>(6.3)         | 94<br>(7.2)  | 0.23    | 597<br>(16.0)  | 153<br>(11.7) | 0.0002  | 351<br>(9.4)   | 166<br>(12.7) | 0.0007  |

Missing information on seropositivity/seronegativity: 384 (2.8%). Comorbidity data from one year after RA diagnosis is used. The results were calculated on 13 505 patients. P values calculated by  $\chi^2$  test. Seropos, seropositive. Seroneg, seronegative.



**Supplemental table 13.** Number and proportions of patients on methotrexate monotherapy at RA onset, 12 and 36 months after RA diagnosis, divided in the different comorbidity categories.

|                                   | <b>RA onset<br/>n: 13 505</b> | <b>12 months<br/>n: 13 373*</b> | <b>36 months<br/>n: 13 030*</b> |
|-----------------------------------|-------------------------------|---------------------------------|---------------------------------|
| <b>Cardiovascular n (%)</b>       | 758 (63.4)                    | 858 (62.1)                      | 698 (54.9)                      |
| <b>Non-cardiac vascular n (%)</b> | 2549 (69.0)                   | 2802 (64.6)                     | 2299 (55.8)                     |
| <b>Malignant n (%)</b>            | 359 (61.8)                    | 509 (65.3)                      | 388 (54.2)                      |
| <b>Endocrine n (%)</b>            | 1820 (69.4)                   | 1717 (62.1)                     | 1371 (51.7)                     |
| <b>Gastrointestinal n (%)</b>     | 558 (63.5)                    | 632 (58.5)                      | 513 (50.5)                      |
| <b>Infectious n (%)</b>           | 513 (61.7)                    | 631 (56.5)                      | 482 (47.4)                      |
| <b>Chronic kidney n (%)</b>       | 50 (47.6)                     | 65 (42.2)                       | 52 (39.1)                       |
| <b>Neurological n (%)</b>         | 656 (70.6)                    | 686 (60.5)                      | 556 (50.5)                      |
| <b>Psychiatric n (%)</b>          | 1310 (66.7)                   | 1356 (58.6)                     | 1074 (48.0)                     |
| <b>Respiratory n (%)</b>          | 413 (56.8)                    | 450 (48.1)                      | 359 (42.1)                      |
| <b>No comorbidity n (%)</b>       | 4133 (68.3)                   | 3177 (61.7)                     | 2577 (50.5)                     |

\*132 died or emigrated up to 12 months after RA onset. An additional 343 died or emigrated up to 36 months after RA onset. Comorbidity data at RA onset refers to reported comorbidities 5 years before to RA diagnosis. Comorbidity data at 12 and 36 months refers to the comorbidity situation 5 years before to 12 months after RA diagnosis.

**Supplemental table 14.** Comparison of treatment categories at the time of RA diagnosis, based on the Prescribed Drug Register or Swedish Rheumatology Quality register, for patients with the different comorbidity categories.

| Comorbidity categories             | MTX monotherapy |             | Non-MTX csDMARDs |           | MTX + csDMARDs |          | b/tsDMARDs |          | No treatment |            |
|------------------------------------|-----------------|-------------|------------------|-----------|----------------|----------|------------|----------|--------------|------------|
|                                    | PDR             | SRQ         | PDR              | SRQ       | PDR            | SRQ      | PDR*       | SRQ      | PDR          | SRQ        |
| <b>Cardiovascular n(%)</b>         | 822 (68.8)      | 758 (63.4)  | 87 (7.3)         | 82 (6.9)  | 14 (1.2)       | 9 (0.8)  | 5 (0.4)    | 20 (1.7) | 267 (22.3)   | 326 (27.3) |
| <b>Non-cardiac vascular n(%)</b>   | 2700 (73.1)     | 2549 (69.0) | 203 (5.5)        | 189 (5.1) | 37 (1.0)       | 16 (0.4) | 27 (0.7)   | 69 (1.9) | 728 (19.7)   | 872 (23.6) |
| <b>Malignant n(%)</b>              | 388 (66.8)      | 359 (61.8)  | 50 (8.6)         | 48 (8.3)  | 7 (1.2)        | 5 (0.9)  | 3 (0.5)    | 3 (0.5)  | 133 (22.9)   | 166 (28.6) |
| <b>Endocrine n(%)</b>              | 1917 (73.1)     | 1820 (69.4) | 164 (6.3)        | 153 (5.8) | 26 (1.0)       | 12 (0.5) | 28 (1.1)   | 60 (2.3) | 488 (18.6)   | 579 (22.1) |
| <b>Gastrointestinal n(%)</b>       | 609 (69.3)      | 558 (63.5)  | 50 (5.7)         | 46 (5.2)  | 9 (1.0)        | 5 (0.6)  | 11 (1.3)   | 20 (2.3) | 200 (22.8)   | 250 (28.4) |
| <b>Infectious n(%)</b>             | 559 (67.2)      | 513 (61.7)  | 66 (7.9)         | 62 (7.5)  | 6 (0.7)        | 4 (0.5)  | 8 (1.0)    | 16 (1.9) | 193 (23.2)   | 237 (28.5) |
| <b>Chronic kidney disease n(%)</b> | 54 (51.4)       | 50 (47.6)   | 12 (11.4)        | 12 (11.4) | 1 (1.0)        | 0        | 4 (3.8)    | 4 (3.8)  | 34 (32.4)    | 39 (37.1)  |
| <b>Neurological n(%)</b>           | 702 (75.6)      | 656 (70.6)  | 32 (3.4)         | 31 (3.3)  | 8 (0.9)        | 3 (0.3)  | 9 (1.0)    | 19 (2.1) | 178 (19.2)   | 220 (23.7) |
| <b>Psychiatric n(%)</b>            | 1410 (71.8)     | 1310 (66.7) | 121 (6.2)        | 108 (5.5) | 19 (1.0)       | 5 (0.3)  | 15 (0.8)   | 42 (2.1) | 398 (20.3)   | 498 (25.4) |
| <b>Respiratory n(%)</b>            | 442 (60.8)      | 413 (56.8)  | 91 (12.5)        | 84 (11.6) | 6 (0.8)        | 3 (0.4)  | 6 (0.8)    | 18 (2.5) | 182 (25.0)   | 209 (28.8) |

Total number of patients: 13 505. \*Data from PDR does not include bDMARDs given as infusions, only drugs prescribed and dispensed at pharmacies. PDR, Prescribed Drug Register; SRQ, Swedish Rheumatology Quality Register.

**Supplemental figure 1.** Time periods used for comorbidity and antirheumatic drug data.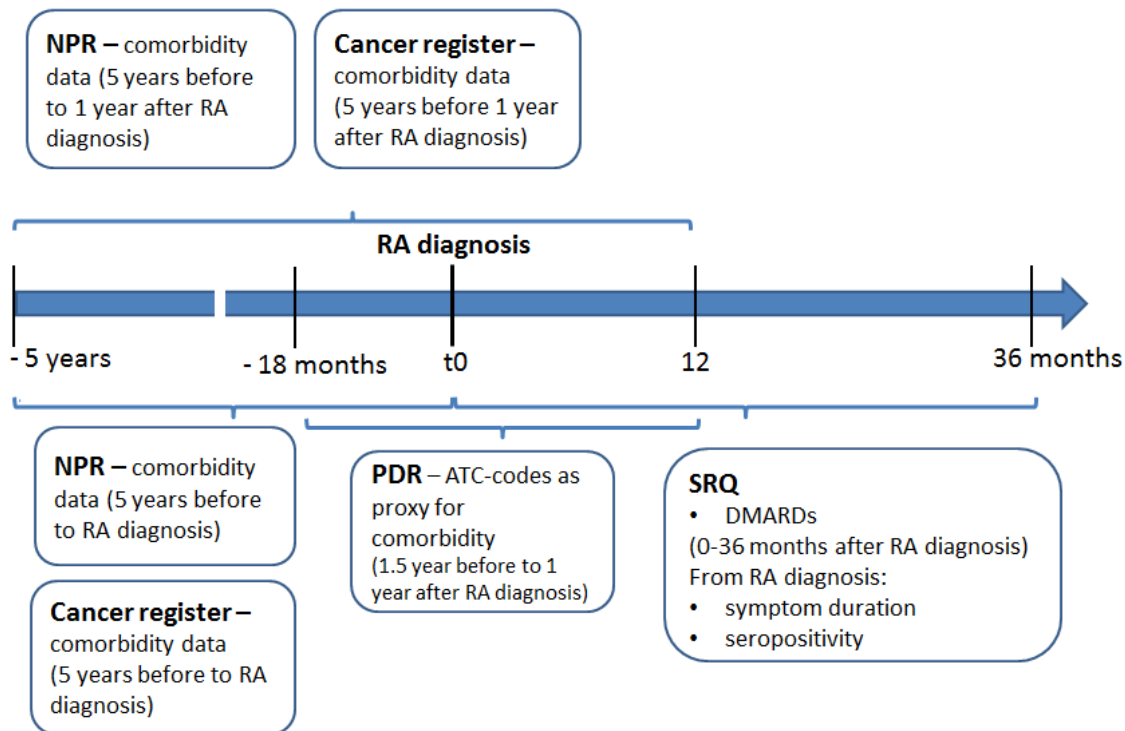

**Supplemental figure 2.** Distribution of different drugs used by RA patients that received different DMARD regimens at diagnosis. The figure shows box plots with median, quartiles and highest numbers of separate ATC-codes that are prescribed and dispensed from 1.5 years before and until RA diagnosis, to capture all prescriptions (renewed once a year).

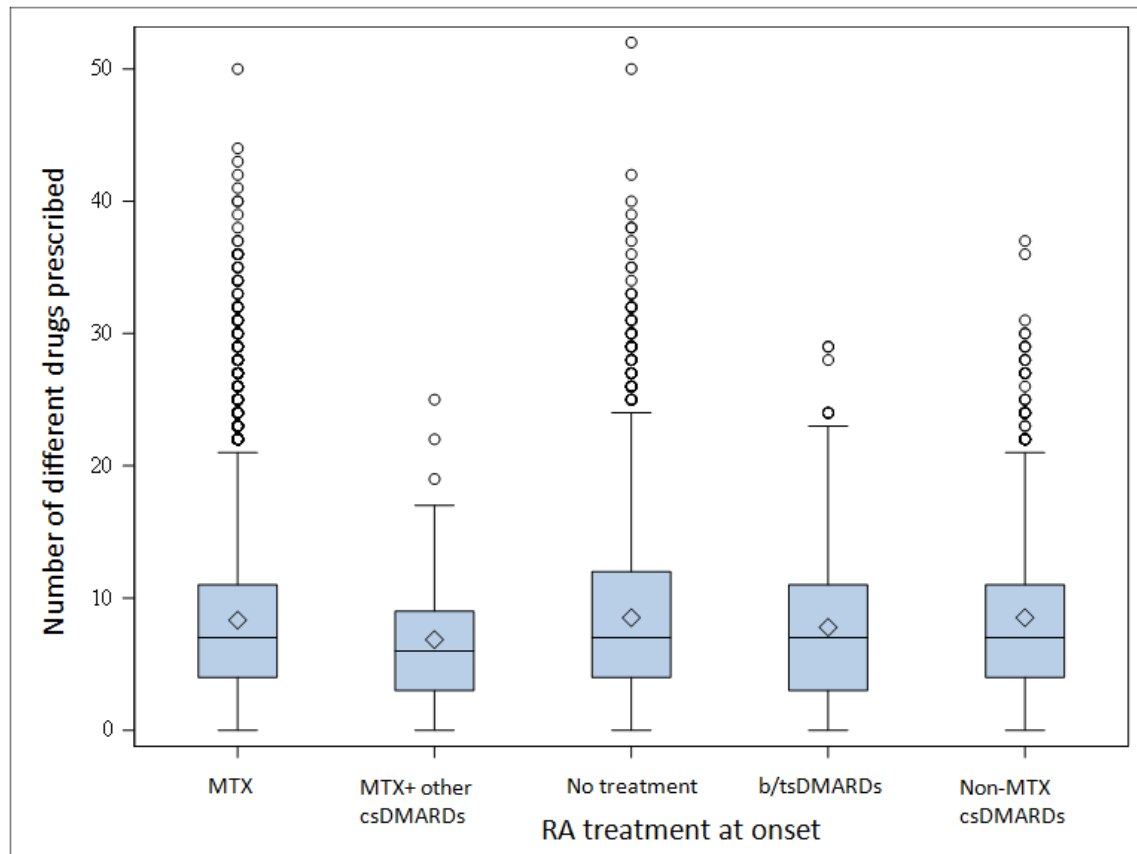

Supplement: rmdopen-2022-002700supp001_data_supplement.pdf [file rmdopen-2022-002700supp001_data_supplement.pdf]
